# Supplementary material for: Inert benzothiazole functionalised ruthenium(ii) complexes; potential DNA hairpin binding agents
Source: Royal Society of Chemistry journal article supplement (doi:10.1039/b516984d), 2006-01-01

**Supplementary Fig. a.:** CD spectra (CH<sub>3</sub>CN) of the chromatographically resolved  $\Delta$ - and  $\Lambda$ -[Ru(bpy)<sub>2</sub>(L)]<sup>2+</sup> (where L = 4,4-bis(benzothiazol-2-yl)-2,2'-bipyridine)  
:  $\Delta$  (Band 1)(-) and  $\Lambda$  (Band 2)(-)

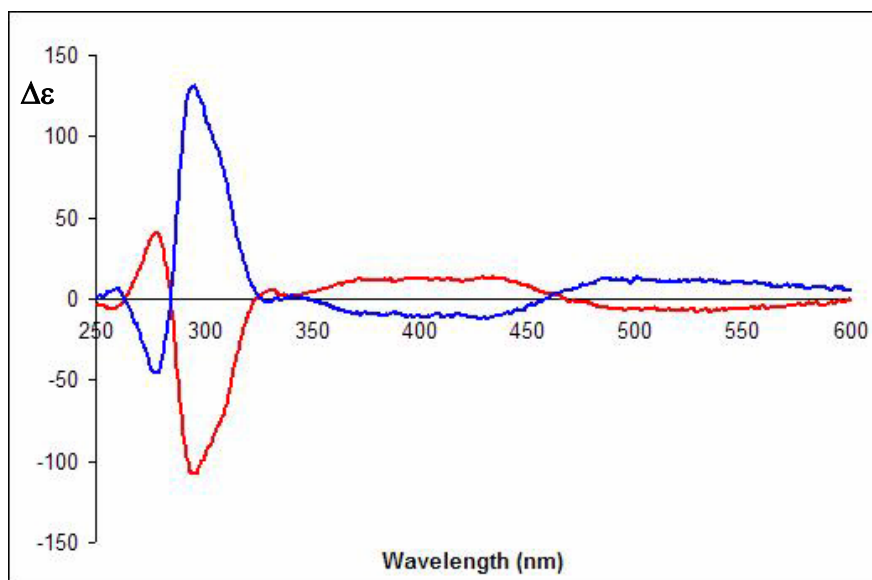

**Supplementary Fig. b.:** The CD spectrum of the dialysate following optical depletion of  $\Lambda$ -[Ru(bpy)<sub>2</sub>(bbtb)]<sup>2+</sup> (leaving the  $\Delta$  isomer behind).

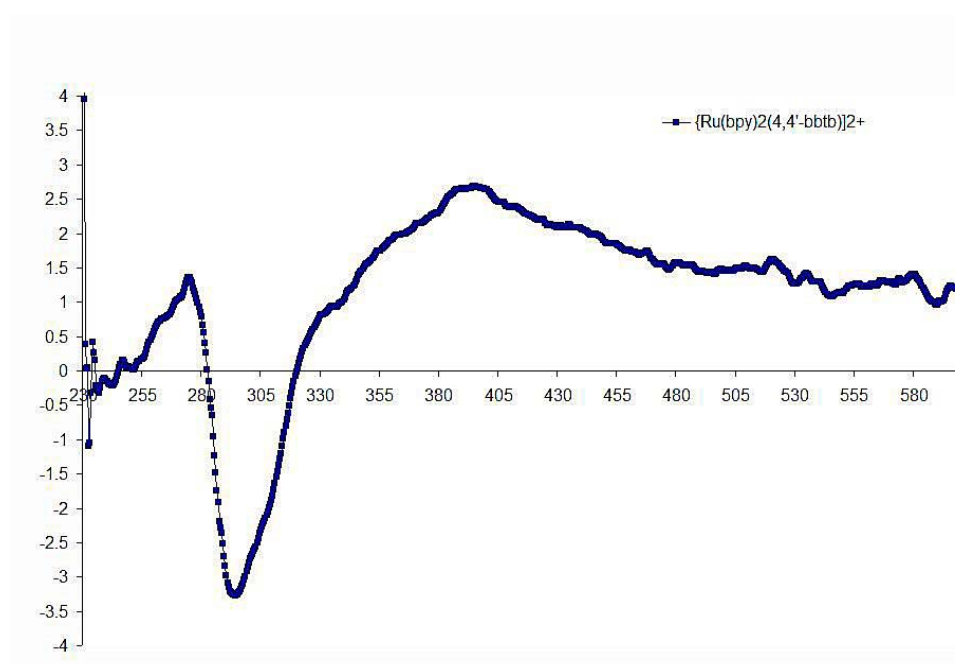

Supplement: b516984d.pdf [file b516984d.pdf]
